# Supplementary material for: Combined Activity of the Redox-Modulating Compound Setanaxib (GKT137831) with Cytotoxic Agents in the Killing of Acute Myeloid Leukemia Cells
Source: MDPI journal article supplement (doi:10.3390/antiox11030513), 2022-03-08
Supplement: s1 [file s1]

## Online Supplement

### Combined activity of the redox-modulating compound Setanaxib (GKT137831) with cytotoxic agents in the killing of acute myeloid leukemia cells

Muhammed Burak Demircan<sup>1,2,3,4</sup>, Peter C. Mgbacheta<sup>1</sup>, Anne Kresinsky<sup>1,3</sup>, Tina M. Schnoeder<sup>2,5</sup>, Katrin Schröder<sup>6</sup>, Florian H. Heidel<sup>2,3,5</sup> and Frank-D. Böhmer<sup>1\*</sup>

<sup>1</sup> Institute of Molecular Cell Biology, CMB, Jena University Hospital, 07745 Jena, Germany; <sup>2</sup> Innere Medizin II, Hämatologie und Onkologie, Jena University Hospital, 07747 Jena, Germany; <sup>3</sup> Leibniz Institute on Aging—Fritz Lipman Institute, 07745 Jena, Germany; <sup>4</sup> Molecular Biotechnology and Gene Therapy, Paul-Ehrlich-Institut, 63225 Langen, Germany; <sup>5</sup> Innere Medizin C, Universitätsmedizin Greifswald, 17475 Greifswald, Germany; <sup>6</sup> Institute for Cardiovascular Physiology, Goethe University, 60590 Frankfurt am Main, Germany

\*Corresponding author: Frank-D. Böhmer, Institute of Molecular Cell Biology, CMB, Jena University Hospital, Hans-Knöll-Strasse 2, 07745 Jena, Germany; Email [i5frbo@uni-jena.de](mailto:i5frbo@uni-jena.de)

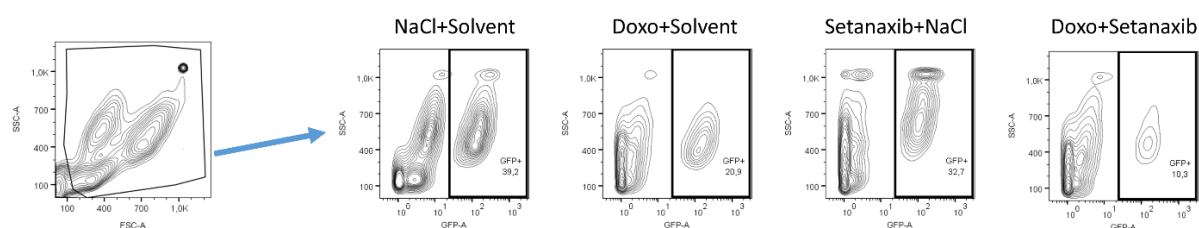

**Figure S1.** Analysis of GFP-positive FLT3-ITD expressing 32D cells in C3H/HeJ mice. Examples of dot-plots for FACS analysis of spleen cells corresponding to data shown in Figure 3B. Spleen cells were prepared as described in Materials and Methods (2.4). Left panel: Gating of cells by forward- and sideward-scatter profiles to exclude debris. Right panels: Detection of 32D-FLT3-ITD cells in the GFP channel. The control GFP+ (NaCl+Solvent) plot corresponds to the shown scatter plot. The other GFP+ plots are example measurements from animals treated with the compounds as indicated. Numbers for GFP+ in the right lower corner represent the percentage of GFP-positive cells.

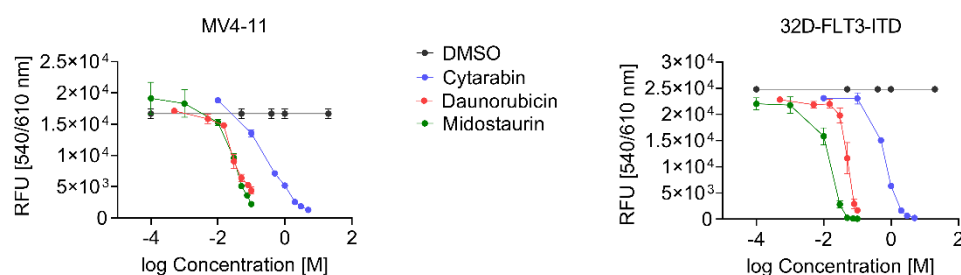

**Figure S2.** Effect of standard cytotoxic drugs on proliferation/viability of MV4-11 and 32D-FLT3-ITD cells. Cells were seeded in 96-well plates, compounds were added, and the proliferation/viability was assessed by Cell Titer Blue assay after 72 hours. The fluorescent signal, which was directly proportional to the number of viable cells, was measured in a plate reader at 540/610 nm (excitation/emission, respectively, RFU- relative fluorescence units).
